# 1 How subjective idea valuation energizes and guides creative idea generation

2  
3  
4 Alizée Lopez-Persem<sup>1</sup>, Sarah Moreno Rodriguez<sup>1</sup>, Marcela Ovando-Tellez<sup>1</sup>, Théophile Bieth<sup>1,2</sup>, Stella  
5 Guiet<sup>1</sup>, Jules Brochard<sup>3</sup>, Emmanuelle Volle<sup>1</sup>

6  
7 1. FrontLab, Sorbonne University, Institut du Cerveau - Paris Brain Institute - ICM, Inserm, CNRS, AP-  
8 HP, Hôpital de la Pitié Salpêtrière, Paris, France.

9 2. Neurology department, Hôpital de la Pitié Salpêtrière, AP-HP, F-75013, Paris, France

10 3. TRA, "Life and Health", University of Bonn, Bonn, Germany

11  
12 **Corresponding authors:** Alizée Lopez-Persem ([lopez.alizee@gmail.com](mailto:lopez.alizee@gmail.com)) & Emmanuelle Volle  
13 ([emmavolle@gmail.com](mailto:emmavolle@gmail.com))

14  
15 **Author Contributions:** EV, ALP designed the study. SMR, SG collected the data and performed model-  
16 free behavioral analyses. TB, MOT, SMR analysed the creativity battery data. ALP, EV, JB  
17 conceptualized the computational model. ALP performed the model-free and computational modelling  
18 analyses. ALP, EV wrote the article. All authors reviewed and edited the article.

19  
20 **Competing Interest Statement:** Authors declare no competing interests.

21  
22 **Classification:** Biological sciences

23  
24 **Keywords:** Creativity, preferences, computational modelling, subjective value, idea generation,  
25 evaluation

26  
27 **This PDF file includes:**

28 Main Text

29 Figures 1 to 7

30  
31

32

## Abstract

33 What drives us to search for creative ideas and why does it feel good to find one? While previous studies  
34 demonstrated the positive influence of intrinsic motivation on creative abilities, how reward and  
35 subjective values play a role in creative mechanisms remains unknown. The existing framework for  
36 creativity investigation distinguishes generation and evaluation phases, and mostly aligns evaluation to  
37 cognitive control processes, without clarifying the mechanisms involved. This study proposes a new  
38 framework for creativity by 1) characterizing the role of individual preferences (how people value ideas)  
39 in creative ideation and 2) providing a computational model that implements three types of operations  
40 required for creative idea generation: knowledge exploration, candidate ideas valuation (attributing  
41 subjective values), and response selection. The findings first provide behavioral evidence demonstrating  
42 the involvement of valuation processes during idea generation: preferred ideas are provided faster.  
43 Second, valuation depends on the adequacy and originality of ideas and determines which ideas are  
44 selected. Finally, the proposed computational model correctly predicts the speed and quality of human  
45 creative responses, as well as interindividual differences in creative abilities. Altogether, this  
46 unprecedented model introduces the mechanistic role of valuation in creativity. It paves the way for a  
47 neurocomputational account of creativity mechanisms.  
48

49

## Significance statement

50 How creative ideas are generated remains poorly understood. Here, we introduce the role of subjective  
51 values (how much one likes an idea) in creative idea generation and explore it using behavioral  
52 experiments and computational modelling. We demonstrate that subjective values play a role in idea  
53 generation processes, and show how these values depend on idea adequacy and originality (two key  
54 creativity criteria). Next, we develop and validate behaviorally a computational model. The model first  
55 mimics semantic knowledge exploration, then assigns a subjective value to each idea explored, and  
56 finally selects a response according to its value. Our study provides a mechanistic model of creative  
57 processes which offers new perspectives for neuroimaging studies, creativity assessment, profiling, and  
58 targets for training programs.  
59

60

## Main Text

61

### 62 1. Introduction

63

64 Creativity is a core component of our ability to promote change and cope with it. Creativity is defined as  
65 the ability to produce an object (or an idea) that is both original and adequate (1–3). Originality is critical  
66 to the concept of creativity; it refers to something novel or unprecedented. However, to be considered  
67 creative, a production also needs to be adequate. Adequacy corresponds to how appropriate, efficient  
68 to the goal a created entity is. The cognitive mechanisms underlying the production of an idea that is  
69 both original and adequate are yet to be elucidated. This study aims to decipher some of the cognitive  
70 processes of creative thinking by developing a new computational model, composed of three main  
71 operations: idea exploration, (e)valuation, and selection.

72 Creativity has been classically conceptualized and studied in neuroscience in the context of three main  
73 frameworks: the divergent thinking approach, the associative theory, and the insight problem-solving  
74 approach (4, 5). Generation tasks are typically used in those approaches, and the generated responses  
75 are overall assessed for originality and adequacy. It is largely admitted that creativity involves two  
76 interacting phases: generation and evaluation. Theoretical models including these two processes have  
77 been proposed (6, 7), such as the “two-fold model of creativity” (8), or the “blind-variation and selective  
78 retention model” (9, 10), a Darwinian-inspired theory stating that ideas are generated and evaluated on  
79 a trial and error basis, similarly to a variation-selection process. Additionally, neuroimaging findings  
80 support the distinction between generative and evaluative processes, notably with the involvement of  
81 the Default Network (DN) in relationship with generation and of the Executive Control Network (ECN) in  
82 relationship with evaluative and selection processes (11–13). However, what kind of processes  
83 underlies evaluation in the context of creativity (in other words, what evaluative processes drive  
84 selection) remains overlooked.

85 Previous frameworks assumed that the originality and adequacy of ideas are evaluated to drive the  
86 selection of an idea during idea production (14). Existing theories also usually align evaluation with

87 controlled or metacognitive processes (i.e., monitoring and applying some control to select or inhibit  
88 early thoughts and adapt to the context) (6, 8, 11, 12, 15–19). However, how these processes work and  
89 result in idea selection remains unknown. Because evaluative processes in other domains involve  
90 subjective values that are assigned to options to guide selection (20), we hypothesize that evaluation in  
91 the context of creativity also requires building a subjective value. As previous work highlighted the  
92 importance of adequacy and originality in idea evaluation, we propose that this value is based on a  
93 combination of originality and adequacy of candidate ideas. Hence, we introduce valuation in the  
94 ideation process and dissociate them from other evaluation and generation processes. Valuation can  
95 be defined as a quantification of the subjective desire or preference for an entity (21) and consists in  
96 assigning a subjective value to an option, i.e., to define how much it is “likeable”.  
97 The neuroscience of value-based decision-making indeed demonstrated that valuation and other  
98 evaluation processes are distinct, experimentally dissociable, and have separate brain substrate (22,  
99 23). Indeed, valuation processes have been investigated for centuries by philosophers, economists,  
100 psychologists, and more recently by neuroscientists (24), outside of the creativity field. Advances in the  
101 neuroscience of decision-making have allowed the identification of a neural network, the Brain Valuation  
102 System (BVS), representing the subjective value of options an agent considers (24). The BVS activity  
103 reflects values in a generic (independent of the kind of items) and automatic (even when we are engaged  
104 in another task) manner (25). Interestingly, the BVS is often coupled with the ECN when a choice has  
105 to be made: in a top-down manner – the ECN modulates values according to the context (26); and in a  
106 bottom-up way – by integrating decision-value, it drives the choice selection (27). The new framework  
107 that we propose through the present study is that the BVS is automatically involved during creativity,  
108 and that evaluation processes in creativity involve valuation, implemented by that network, in interaction  
109 with exploration and selection processes, supported by other networks.  
110 Some studies have reported indirect arguments for the involvement of the BVS in creativity through a  
111 link with dopamine (28) or activation of the ventral striatum (16). Nevertheless, very little is known about  
112 the role of the BVS in creativity, and its interaction with the commonly reported brain networks (DN and  
113 ECN) for creativity has, to our knowledge, not been explored. In fact, the place of valuation processes  
114 in creativity still needs to be conceptualized and empirically investigated.  
115 Here, we formulate the unprecedented hypothesis that originality and adequacy are combined into a  
116 “subjective value” according to individual preferences, and that this subjective value drives the creative  
117 degree of the output. This value can impact the selection of an idea, and also possibly have a  
118 motivational role (29) on the exploration of candidate ideas. Taking into account previous research from  
119 both creativity and decision-making fields, we hypothesize that creativity involves i) an *explorer* module  
120 that works on individual knowledge representations and provide a set of options/ideas varying in  
121 originality and adequacy; ii) a *valuator* module that computes the likeability of candidate ideas (their  
122 subjective value) based on a combination of their originality and adequacy with the goal an agent tries  
123 to reach; iii) a *selector* module that applies contextual constraints and integrates the subjective value of  
124 candidate ideas to guide the selection. To test these hypotheses, we combined several methods of  
125 cognitive and computational neuroscience. We build a computational model composed of the *explorer*,  
126 *valuator* and *selector* modules, that we modelled separately (Figure 1) as detailed below.  
127 First, producing something new and appropriate (i.e. creative) relies in part on the ability to retrieve,  
128 manipulate or combine elements of knowledge stored in our memory (30, 31). Semantic memory  
129 network methods are a valuable approach to study these processes (32–35). Several semantic search  
130 mechanisms have been previously explored using for instance censored and biased random walks  
131 within semantic networks (36). The use of those models was essentially restricted to explaining fluency  
132 tasks (37) and retrieval of remote associates (38), but they have not yet been combined with decision  
133 models that could bring new insights into how individuals reach a creative solution. Based on this  
134 literature, we modelled the *explorer* module as a random walk wandering into semantic networks.  
135 Second, valuation and selection processes are typically studied using decision models. Utility (economic  
136 term for subjective value) functions can well capture valuation of multi-attribute options that weigh  
137 attributes differently depending on individuals (39–41). Hence, we modelled the *valuator* module of our  
138 model as a utility function that assigns subjective values to candidate ideas based on the subjective  
139 evaluation of their adequacy and originality, considered as the necessary attributes of creative idea.  
140 Third, the computed subjective value is then used to make a decision. Decision models assess value-  
141 based choices and can be static like softmax (42), dynamic like drift-diffusion models (43), or biologically  
142 inspired (44). Simple models like softmax functions can explain many types of choices, ranging from  
143 concrete food choices to abstract moral choices, as soon as they rely on subjective values. Here, we  
144 reasoned that such a simple function can capture and predict creative choices (*selector* module), when  
145 taking as an input subjective values of candidate ideas.  
146

147 Overall, by means of different approaches to test our hypotheses, we developed an original  
148 computational model (Figure 1) in which each module (*explorer*, *valuator*, *selector*) was modelled  
149 separately. We aimed at 1) determining whether subjective valuation occurs during idea generation  
150 (creativity task) and defining a *valuator* module from behavioral measures during the decision-making  
151 tasks; 2) Developing the *explorer* and *selector* modules, and characterizing which module(s) relies on  
152 subjective valuation (*explorer* and/or *selector*); 3) Simulating surrogate data from the full model  
153 composed of the three modules and comparing it to human behavior; and 4) assessing the relevance  
154 of the model parameters for creative abilities.  
155

## 156 2. Results

157  
158 Sixty-nine subjects were included in the analyses (see Methods 4.1). The experiment consisted of  
159 several successive tasks (Figure 2, see Methods 4.2): the Free Generation of Associate Task (FGAT),  
160 designed to investigate generative processes and creative abilities, a likeability rating task, a choice  
161 task, an originality and adequacy rating task, and a battery of creativity assessment.  
162

### 163 2.1. Subjective valuation in idea generation and development of the 164 *valuator* module

#### 165 2.1.1. FGAT behavior: the effect of task condition on speed and link with likeability

166  
167 In the *First* condition of the FGAT task, participants were asked to provide the first word that came to  
168 mind in response to a cue. In the *Distant* condition, they had to provide an original, unusual, but  
169 associated response to the same cues as in the *First* condition (see Figure 2 and Methods 4.2.1).  
170 We investigated the quality and speed of responses provided in the FGAT task in the *First* and *Distant*  
171 conditions. The quality of responses was investigated using their associative frequency obtained from  
172 the French database of word associations *Dictaverf* (see Methods 4.3.1), and using the ratings  
173 participants provided in three rating tasks requiring them to judge how much they liked an idea (likeability  
174 or satisfaction of a response to the FGAT *Distant* condition, see Methods 4.2.2), how much original they  
175 found it (originality), and how appropriate (adequacy).  
176  
177

#### 178 *FGAT responses: associative frequency*

179 Consistent with the instructions of the FGAT conditions, we found that participants provided more  
180 frequent responses (i.e., more common responses to a given cue based on the French norms of word  
181 associations *Dictaverf*) in the *First* condition than in the *Distant* condition ( $\log(\text{Frequency}_{\text{First}})=-$   
182  $3.25\pm 0.11$ ,  $\log(\text{Frequency}_{\text{Distant}})=-6.21\pm 0.11$ ,  $M\pm\text{SEM}$ ,  $t(68)=18.93$ ,  $p=8.10^{-29}$ ). Then, we observed that  
183 response time in the FGAT task decreased with the cue-response associative frequency, both in the  
184 *First* ( $\beta=-0.34\pm 0.02$ ,  $t(68)=-15.92$ ,  $p=1.10^{-24}$ ) and *Distant* ( $\beta=-0.10\pm 0.02$ ,  $t(68)=-6.27$ ,  $p=3.10^{-8}$ )  
185 conditions, suggesting that it takes more time to provide a rare response compared to a common one  
186 (Figure 3A). We also observed that the cue steepness (how strongly connected is the first associate of  
187 the cue, see Methods 4.3.1) also significantly shortened response time for *First* responses but not  
188 significantly for *Distant* responses ( $\beta_{\text{First}}=-0.13\pm 0.02$ ,  $t(68)=-8.5$ ,  $p=3.10^{-12}$ ;  $\beta_{\text{Distant}}=-0.02\pm 0.01$ ,  $t(68)=-$   
189  $1.16$ ,  $p=0.25$ , Figure 3B).  
190

#### 191 *FGAT responses: adequacy and originality*

192 Using adequacy and originality ratings provided by the participants, we found that *First* responses were  
193 rated as more adequate than *Distant* responses ( $\text{Adequacy}_{\text{First}}=86.47\pm 0.99$ ,  $\text{Adequacy}_{\text{Distant}}=77.24\pm 1.23$ ,  
194  $t(68)=9.29$ ,  $p=1.10^{-13}$ ), but *Distant* responses were rated as more original than *First* responses  
195 ( $\text{Originality}_{\text{First}}=33.80\pm 1.74$ ,  $\text{Originality}_{\text{Distant}}=64.43\pm 1.37$ ,  $t(68)=-16.36$ ,  $p=3.10^{-25}$ ). Note that the  
196 difference in originality ratings (*First* versus *Distant* responses) was greater than the difference in  
197 adequacy ratings ( $t(68)=-13.87$ ,  $p=2.10^{-21}$ ), suggesting that *Distant* responses were found both  
198 adequate and original, i.e., creative, while *First* responses were mainly appropriate (Figure 3C).  
199

#### 200 *FGAT responses: likeability*

201 Last, we considered that response time and typing speed could reflect an implicit valuation of responses  
202 (45). To test whether an implicit subjective valuation of response happened during the FGAT creative  
203 condition (*Distant*), we investigated the link between response time, typing speed, and the likeability of

204 their own FGAT responses (see Methods 4.3.1). We found that response time in the *Distant* condition  
205 decreased with likeability ( $\beta_{Distant}=-0.15\pm 0.02$ ,  $t(68)=-7.25$ ,  $p=5.10^{-10}$ ) and that typing speed increased  
206 with it ( $\beta_{Distant}=0.08\pm 0.02$ ,  $t(68)=3.88$ ,  $p=2.10^{-4}$ ). Participants were faster for providing *Distant* FGAT  
207 responses they liked the most. The pattern was different in the *First* condition, in which we observed a  
208 significant increase of response time with likeability ( $\beta_{First}=0.08\pm 0.02$ ,  $t(68)=3.78$ ,  $p=3.10^{-4}$ ) and no  
209 significant effect of likeability on typing speed ( $\beta_{First}=0.009\pm 0.02$ ,  $t(68)=0.36$ ,  $p=0.72$ ). The effects of  
210 likeability significantly differed at the group level between the *First* and *Distant* conditions (*Distant* versus  
211 *First* effect of likeability on response time:  $t(68)=-7.30$ ,  $p=4.10^{-10}$ ; on typing speed:  $t(68)=2.21$ ,  $p=0.03$ ,  
212 Figure 3D).

213 Note that the link between likeability rating and response time, or typing speed remains after removing  
214 confounding factors (adequacy and originality ratings, SI Table S1).

215  
216 Together, those findings suggest that likeability might have been cognitively processed during the FGAT  
217 task and influenced the behavior, particularly during the FGAT *Distant* condition, which is assumed to  
218 require an evaluation of the response before the participants typed their answers. We also found that  
219 likeability ratings drove choices (choice task, see SI Supplementary Results and Figure S1), suggesting  
220 that likeability is relevant both in the FGAT *Distant* condition, and in binary choices linked to creative  
221 response production. We next assessed how likeability ratings relied on adequacy and originality ratings.  
222

### 223 2.1.2. Likeability depends on originality and adequacy ratings

224  
225 To better understand how subjects built their subjective value and assigned a likeability rating to a cue-  
226 response association, we focused on the behavior measured during the rating tasks. In the rating tasks,  
227 participants judged a series of cue-response associations in terms of their likeability, adequacy and  
228 originality (see Figure 2 and Methods 4.2.2). Here, we explored the relationship between those three  
229 types of ratings.

230 We first observed that likeability increased with both originality and adequacy (Figure 4). Then, to  
231 precisely capture how adequacy and originality contributed to likeability judgments, we compared 12  
232 different linear and non-linear models (see Methods 4.3.4). Among them, the Constant Elasticity of  
233 Substitution (CES) model out performed (41) the alternatives (Estimated model frequency:  $E_f=0.36$ ,  
234 Exceedance probability:  $X_p=0.87$ ). CES combines originality and adequacy with a weighting parameter  
235  $\alpha$  and a convexity parameter  $\delta$  into a subjective value (likeability rating) (see equation in Figure 1 and fit  
236 in Figure 4). Mean values of  $\alpha$  and  $\delta$  are detailed in SI.

237  
238 Overall, these results indicate that subjective valuation seems to occur during idea generation, as we  
239 observed significant relationships between response speed and likeability ratings in the generation task.  
240 Additionally, the rating tasks allow us to characterize the *valuator* module as the Constant Elasticity of  
241 Substitution utility function (CES), that builds a subjective value from adequacy and originality ratings.  
242

## 243 2.2. Computational modelling of the valuator module

244  
245 The goal of our computational model is to explain and predict the behavior of participants in the FGAT,  
246 by modelling an *explorer* that generates a set of candidate ideas, a *valuator* that assigns a subjective  
247 value to each candidate idea, and a *selector* that selects a response based (or not) on this subjective  
248 value. Our computational model thus needed to be able to predict likeability of any potential cue-  
249 response associations, including those that have not been rated by our participants (see section 4.2.2),  
250 and those that have not been expressed by participants during the FGAT *Distant* condition (hidden  
251 candidate ideas).

252 We found that adequacy and originality rating could be correctly predicted by associative frequency (see  
253 SI Supplementary Results and Figure S2). Adequacy ratings could be well fitted through a linear relation  
254 with frequency ( $E_{fin}=0.86$ ,  $X_{pin}=1$ ), and originality could be estimated through a mixture of linear and  
255 quadratic link with frequency. This result allows us to estimate adequacy and originality of any cue-  
256 response association for a given participant.

257 Importantly, we explored the validity of the *valuator* module using estimated adequacy and originality.  
258 We estimated likeability from the estimated adequacy and originality, using the individual parameters of  
259 the CES function mentioned above. We found a strong relationship between estimated and real  
260 likeability judgements (mean  $r=0.24\pm 0.02$ ,  $t(68)=11.04$ ,  $p=8.10^{-17}$ ).  
261

262 This result is not only a critical validation of our model linking likeability, originality and adequacy, but  
263 also allows defining a set of parameters for each individual for the *valuator* module. Thanks to that set  
264 of parameters, we were able to significantly predict the originality, adequacy, and likeability ratings of  
265 any cue-response association based on its objective associative frequency. Henceforth, in the next  
266 analyses, likeability, adequacy, and originality estimated through that procedure will be referred to as  
267 the “estimated” variables.  
268

269 In the next section, using computational modelling, we address the second aim of our study, which was  
270 to develop the *explorer* and the *selector* and determine which module the *valuator* drives the most.  
271

## 272 **2.3. Computational modelling of the exploration and selection** 273 **modules**

### 274 2.3.1. Model description and overall strategy

275 As we do not have a direct access to the candidate ideas that participants explored before selecting and  
276 producing their response to each cue during the FGAT task, we adopted a computational approach that  
277 uses random walk simulations ran on semantic networks (one per FGAT cue) to develop the *explorer*  
278 module. We built a model that coupled random walk simulations (*explorer*) to a valuation (*valuator*) and  
279 selection (*selector*) function (Figure 1). The model takes as input an FGAT cue and generates responses  
280 for the *First* and *Distant* conditions, allowing us to ultimately test how similar the predicted responses  
281 from the model were to the real responses of the participants.  
282

283 In the following analyses, we decompose the model into modules (random walks and selection  
284 functions) and investigate by which variable (estimated likeability, estimated originality, estimated  
285 adequacy, associative frequency or mixtures) each module is more likely to be driven.  
286

287 To assess the validity of the model, we developed it and conducted the analyses on 46 subjects (2/3 of  
288 them) and then cross-validated the behavioral predictions on the 23 remaining participants.  
289

### 290 2.3.2. Modelling the *explorer* module using random walks on semantic networks

291 For each cue, we built a semantic network from the *Dictaverf* database that was enriched from both *First*  
292 and *Distant* FGAT responses from all participants (see Methods 4.3.6). Then, to investigate whether  
293 exploration could be driven by likeability, we compared five censored random walks (RW), each with  
294 different transition probabilities between nodes (random, associative frequency, adequacy, originality or  
295 likeability, see Methods 4.3.6). For each random walk, subject, and cue, we computed the probability of  
296 the random walk to visit the *First* and the *Distant* responses nodes (Figure 5A). We found that the  
297 frequency-driven random walk (RWF) had the highest chance to walk through the *First* (mean probability  
298 =  $0.30 \pm 0.01$ ; all  $p < 10^{-33}$ ) and *Distant* (mean probability =  $0.05 \pm 0.004$ ; all  $p < 10^{-4}$ ) responses. This result  
299 suggests that the *explorer* module may be driven by associative frequency between words in semantic  
300 memory. According to this result, we pursued the analyses and simulations with the RWF as an *explorer*  
301 module for both *First* and *Distant* responses.  
302

### 303 2.3.3. Visited nodes with the RWF as a proxy for candidate responses

304 To define sets of candidate responses that will then be considered as options by the *selector* module,  
305 we simulated the RWF model for each subject and each cue over 18 (see Methods 4.2.4 and 4.3.6).  
306 Each random walk produced a path: i.e., a list of words (nodes) visited at each iteration. Each node is  
307 associated with a rank (position in the path), which will then be used as a proxy of response time. As a  
308 sanity check, we compared the list of words obtained from those random walks to the participants’  
309 responses to a fluency task on six of the FGAT cues (see Methods 4.2.4). For each subject, we identified  
310 the common words between the model path and the fluency responses. Then, using a mixed-effect  
311 linear regression with participants and cues as random factors (applied to both intercept and slope), we  
312 regressed the node model rank against its corresponding fluency rank. We found a significant fixed  
313 effect of the fluency rank ( $\beta = 0.12 \pm 0.03$ ,  $t(649) = 3.35$ ,  $p = 8.10^{-3}$ , SI Figure S3), suggesting that those  
314 simulations provide an adequate proxy for semantic memory exploration.  
315

316 Together, results reported in sections 2.3.2 and 2.3.3 suggest that a censored random walk driven by  
317 the frequency of word associations provides a good approximation of semantic exploration during  
318

320 response generation in the FGAT task and that likeability has a negligible role during that phase. Hence,  
321 valuation does not seem to play a significant role in the *explorer* module.  
322

#### 323 2.3.4. Modelling the *selector* module as a decision function

324  
325 We then explored the possible factors driving individual decisions to choose a given response (*selector*  
326 module) among the word nodes visited by the *explorer* module.

327 To investigate the selection of *First* and *Distant* responses among all nodes in each path, i.e., on which  
328 dimension responses were likely to be selected, we compared seven choice models with different  
329 variables as input: random values, node rank (first visited nodes have higher chances of being selected),  
330 estimated adequacy, estimated originality, interaction between estimated adequacy and originality, sum  
331 of estimated adequacy and originality, and estimated likeability (see Methods 4.3.7). We found that  
332 estimated adequacy was the best criterion to explain the selection of *First* responses ( $E_{\text{adequacy}}=0.89$ ,  
333  $X_{\text{adequacy}}=1$ ) and likeability was the best criterion to explain the selection of *Distant* responses  
334 ( $E_{\text{likeability}}=0.66$ ,  $X_{\text{likeability}}=0.99$ ) (Figure 5B). These results indicate that valuation (based on individual  
335 likeability) is needed to select a creative response in the creative condition of the FGAT (*Distant*).  
336

### 337 2.4. Validity of the full model: does it predict behavioral responses in 338 the test group? 339

340 After having characterized the equations and individual parameters of the *valuator* on all participants  
341 using the rating tasks, and of the *explorer* and *selector* modules on a subset of participants ( $n_1=46$ ), we  
342 checked whether this model could generate surrogate data similar to the behavior of the remaining  
343 participants (test group,  $n_2=23$ ). We simulated behavioral data and response time from the full model  
344 (*explorer*, *valuator*, *selector*), depicted in Figure 1 (See Methods 4.3.8).

345 We analyzed the behavior of the simulated data the same way we analyzed the behavior of the real  
346 human data of the test group (see Methods 4.3.8). We found the same patterns at the group level (SI  
347 Table S2, Figure 6 and S4): 1) *First* responses were much more common than *Distant* responses (Figure  
348 6A, B); 2) the rank in path decreased with the group frequency of responses, both for *First* and *Distant*  
349 responses (Figure 6A, B), confirming that it takes more time to provide a rare response compared to a  
350 common one; 3) Ranks decreased with the cue steepness, both for *First* and *Distant* responses (Figure  
351 6C, D); 4) Ranks of the *Distant* responses decreased with estimated likeability. The effect was significant  
352 only for *Distant* responses and the difference between regression estimates for *First* and *Distant*  
353 responses was significant. (Figure 6E, F); 5) *First* responses were more appropriate than *Distant*  
354 responses, but *Distant* responses were more original than *First* responses. The difference in originality  
355 rating between *First* and *Distant* responses was bigger than the difference in adequacy (SI Figure S4).  
356 Additionally, we checked whether the surrogate data generated by the model for each participant was  
357 relevant at the inter-individual level. We estimated the *selector* parameters for the test group and  
358 conducted the analyses on all participants to increase statistical power. We found that the mean  
359 response time per participant across trials of the FGAT *Distant* condition was correlated with the mean  
360 rank of *Distant* responses across trials in the model exploration path ( $r=0.72$ ,  $p=1.10^{-4}$ ). Similarly, the  
361 mean associative frequency (*Dictaverf*) of participants' *Distant* responses was significantly correlated to  
362 the mean frequency of the model *Distant* responses ( $r=0.53$ ,  $p=9.10^{-3}$ ). These results mean that the  
363 model successfully predicted individual behavioral differences in the FGAT task.  
364

### 365 2.5. Relevance of model parameters for creative abilities 366

367 Finally, to assess the relevance of the individual model parameters in relation to the FGAT task for  
368 creative abilities, we defined two sets of variables: FGAT parameters and scores reflecting the *valuator*,  
369 *selector* and *explorer* individual characteristics, and Battery scores related to several aspects of  
370 creativity (see Methods 4.2.4 and SI Methods). We conducted a canonical correlation analysis between  
371 those two sets in all participants and found one canonical variable showing significant dependence  
372 between them ( $r=0.61$ ,  $p=0.0057$ ). When assessing which variables within each set had the highest  
373 coefficient to the canonical score, we found that the two likeability parameters ( $\alpha$  and  $\delta$ , from the  
374 *valuator*), the inverse temperature (choice stochasticity, from the choice task, see SI results and  
375 Methods 4.3.3) of the *Distant* response selection (from the *selector*) and the *First* response associative  
376 frequencies were significantly contributing the FGAT canonical variable. Additionally, fluency score from  
377 the fluency task and from the alternative uses task (AUT), creativity self-report, and PrefScore (self-  
378 report of preferences regarding ideas) significantly contributed to the Battery canonical variable. No

379 significant contribution was observed from creative activities (C-Act) and achievements (C-Ach) in real  
380 life scores (Table S3, Figure 7). Overall, this significant canonical correlation indicates that measures of  
381 valuation and selection relate to creative behavior.  
382

## 383 **3. Discussion**

384

### 385 **3.1. Summary**

386

387 In the current study, we investigated the role of valuation based on adequacy and originality in idea  
388 generation and creativity. We found that people built subjective values of ideas based on their adequacy  
389 and originality that guided their preference and impacted their idea generation during the FGAT task.  
390 There was a signature of this value in the response speed of the participants during the FGAT task.  
391 Then, we investigated whether preferences were more likely to impact semantic exploration or response  
392 selection using a computational model combining random walk on semantic networks (*explorer*), the  
393 subjective valuation of candidate responses (*valuator*), and decision for response selection (*selector*).  
394 We found that semantic exploration was more likely to be driven by the associative frequency between  
395 words, independently of the individual goal (providing the first response that comes to mind vs. providing  
396 a creative response). On the contrary, response selection was driven by adequacy for an uncreative  
397 goal and by likeability for a creative goal. Critically, we have shown that our computational model is able  
398 to predict the main behavioral patterns of human participants solely by using individual preference  
399 parameters, estimated from rating tasks. Finally, we confirmed the relevance for creative abilities of the  
400 individual parameters computed with our model.  
401

401

### 402 **3.2. Preferred associations are produced faster when thinking** 403 **creatively**

404

405 Using the FGAT task, previously associated with creative abilities (13), we found that *Distant* responses  
406 were overall more original and slower in response time than *First* responses. In addition, response time  
407 decreased with steepness (only for *First*) and cue-response associative frequency. Those results are in  
408 line with the notion that it takes time to provide an original and rare response (46, 47).

409 Critically, we identified that the likeability of *Distant* responses was negatively linked to response time  
410 and positively linked to typing speed. Interpretation of response time can be challenging as it could  
411 reflect the easiness of choice (48), the quantity of effort or control required for action (49), motivation  
412 (45), or confidence (50). In any case, this result, surviving correction for potential confounding factors  
413 (see Results 2.1.1), represents evidence that subjective valuation of ideas occurs during a creative  
414 (hidden) choice. To our knowledge, this is the first time that such a result has been demonstrated. With  
415 our computational model, we attempt to provide an explanation of a potential underlying mechanism  
416 involving value-based idea selection.  
417

417

### 418 **3.3. Subjective valuation of ideas drives the selection of a creative** 419 **response**

420

421 The striking novelty our results reveal is the role of the *valuator* module coupled with the *selector* module  
422 in idea generation. These modules are directly inspired by the value-based decision-making field of  
423 research (24, 51). To make any kind of goal-directed choice, an agent needs to assign a subjective  
424 value to items or options at stake, so that they can be compared and one of them can be selected (52).  
425 Here, we hypothesized that providing a creative response involves such a goal-directed choice that  
426 would logically require the subjective valuation of candidate ideas. After finding a behavioral signature  
427 of subjective valuation in response time and typing speed, we have shown that *Distant* response  
428 selection among a set of options was best explained by likeability judgments. This pattern was similar  
429 to the behavior observed in the choice task, explicitly asking participants to choose the response they  
430 would have preferred to give in the FGAT *Distant* condition. Valuation is closely related to motivation  
431 process, as it is assumed that subjective values would energize behaviors (53). Previous studies have  
432 highlighted the importance of motivation in creativity (54, 55). However, those reports were mainly based  
433 on interindividual correlations, while our study brings new evidence for the role of motivation in creativity  
434 with a mechanistic approach. Our findings support the hypothesis that the Brain Valuation System is



435 involved in creative thinking and paves the way to later investigate its neural response during creative  
436 experimental tasks.

437  
438 Our study also reveals some of the mechanisms about how individual preferences are built and used to  
439 make creative choices. Using the rating tasks and comparing several valuation functions, we identified  
440 how originality and adequacy ratings were taken into account to build likeability, and determined  
441 preference parameters (relative weight of originality and adequacy and convexity of preference) to  
442 predict the subjective likeability of any cue-response association. Subjective likeability relied on  
443 subjective adequacy and originality. The identified valuation function linking likeability with adequacy  
444 and originality, i.e., the Constant Elasticity of Substitution utility function, has been previously used to  
445 explain moral choices or economic choices (56, 57, 41), making it an appropriate candidate for the  
446 *valuator* module of our model. Overall, these results indicate that likeability is a relevant measure of the  
447 individual values that participants attributed to their ideas, and inform us on how it relies on the  
448 combination of originality and adequacy.

449  
450 The second novelty of our study is to provide a valid full computational model composed of an *explorer*,  
451 a *valuator* and a *selector* module. We characterized these modules, and brought an unprecedented  
452 mechanistic understanding of creative idea generation. This full model is able to generate surrogate  
453 data similar to the real human behavior, both at the group and inter-individual level.

### 455 **3.4. A computational model that provides a mechanistic explanation** 456 **of idea generation**

457  
458 The computational model presented in the current study is consistent with previous theoretical  
459 frameworks involving two phases in creativity: exploration and evaluation/selection (7–10). The *explorer*  
460 module was developed using random walks as it had been successfully done in previous studies to  
461 mimic semantic exploration (58). Here, we found that the simulated semantic exploration was driven by  
462 associative frequency between words, but was not biased by subjective judgments of likeability,  
463 adequacy or originality. This result is consistent with a recent study showing that a random walk applied  
464 to a semantic network was sufficient to predict the pattern of responses in a fluency task (38). In that  
465 study, the authors also demonstrated that creative abilities were linked to the network structure rather  
466 than to the search process, replicating a previous result (30). Here, we could not draw any conclusion  
467 about the link between the individual semantic network structure and creative abilities, since we did not  
468 have access to individual semantic networks and used the same semantic network for all participants.  
469 Nevertheless, we have shown that a frequency biased random walk yielded higher probabilities of  
470 reaching real individual responses compared to other biased random walks. This result is consistent  
471 with the associative theory of creativity (59), which assumes that creative search is facilitated by  
472 semantic memory structure, and with experimental studies linking creativity and semantic network  
473 structure (60) or word associations (61). Indeed, the random walks that we compared could be combined  
474 in three groups: purely random, structure-driven (frequency-biased) and goal-directed (cue-related  
475 adequacy, originality and likeability biased). Here, we found that the structure-driven random walk  
476 outperformed the random and goal-directed random walks, providing further evidence that semantic  
477 search has a spontaneous, bottom-up component, and with previous studies that used free fluency tasks  
478 (60) or word association tasks (61).

479  
480 Overall, our computational approach does not explore the neural mechanism of creative response  
481 generation per se, yet it has several strengths. First, it considers creativity as a plural mechanism (three  
482 modules) occurring in each individual. Second, it adds to previous research a new framework to explore  
483 creativity by combining semantic search and value-based response selection. Third, it allows behavioral  
484 predictions at the individual and group level. Classically, creativity is investigated as an ability varying  
485 across individuals, and differences between low and high creative abilities are investigated. Although  
486 this approach has allowed the discovery of key results about human creativity - such as the importance  
487 of semantic network structure or the impact of motivation - it prevents understanding how the human  
488 brain implements idea generation and selection, independently of its creative performance.  
489 Computational cognitive modelling is now widely used in cognitive neuroscience but it has rarely been  
490 applied to neuroscience of creativity. The use of model fitting procedure, model selection and surrogate  
491 data generation, in accordance with guidelines suggested by previous work (62), has a high potential  
492 for better understanding underlying mechanisms of creativity as demonstrated in our study.

493

### 494 **3.5. Limitations**

495 Some limitations to this study need to be acknowledged. First, the present study assesses creative  
496 cognition in the semantic domain. To fully validate our computational model and the core role of  
497 preference-based idea selection, it is necessary to apply similar analyses on other domains such as  
498 drawing or music. Second, to build our model, we made many assumptions, such as the structure of  
499 semantic networks, and each of them should be tested explicitly in future studies. Third, our main result  
500 concludes on the role of motivation and preferences in idea selection, but their role in the exploration  
501 process per se remain to be further understood. Fourth, our model is for now quite serial and needs  
502 more development. For instance, the number of ideas considered at each step was fixed in our model,  
503 but one should also consider that a smaller number of ideas are evaluated at each step and that the  
504 whole process is restarted if a threshold value is not reached. Thus, our model will need some further  
505 extension, notably by adding iterations and a “stop” criterion.

506

### 507 **3.6. Conclusion**

508

509 The present study reveals the role of individual preferences and decision making in creativity, by  
510 decomposing and characterizing the exploration and the evaluation/selection processes of idea  
511 generation. Our findings demonstrate that the exploration process relied on associative thinking while  
512 the selection process depended on the valuation of ideas. We also show how preferences are formed  
513 by weighting adequacy and originality of ideas. By assessing creativity at the group level, beyond the  
514 classical interindividual assessment of creative abilities, the current study paves the way to a new  
515 framework for creativity research and places creativity as a complex goal-directed behavior driven by  
516 reward signals. Future neuroimaging studies will examine the neural validity of our model.  
517

## 518 **4. Materials and Methods**

519

### 520 **4.1. Participants**

521 The study was approved by an official ethics committee. Seventy-one participants were recruited and  
522 tested thanks to the PRISME platform of the Paris Brain Institute (ICM). They gave informed consent,  
523 and were compensated for their participation. Inclusion criteria were: being right-handed, native French  
524 speakers, between 22 and 40 years old, with correct or corrected vision and no history of neurological  
525 or psychiatric disease. Two participants were excluded because of a misunderstanding of the  
526 instructions, bringing the final number of participants to 69 (41 females and 28 males; mean age:  
527 25.8±4.5; mean level of education: number of study years following French A-levels: 5.0±1.6).  
528

### 529 **4.2. Experimental design**

530 Each participant performed three types of tasks of creative generation and evaluation of ideas, which  
531 were followed by a battery of tests classically used in the laboratory and assessing the participant's  
532 creative abilities. All tasks and tests were computerized and administered in the same fixed order for all  
533 participants.  
534

#### 535 **4.2.1. Free Generation of Associations Task (FGAT)**

536

537 The Free Generation of Associations Task (hereafter referred to as FGAT) is a word association task,  
538 previously shown to capture aspects of creativity (13) (63). It is composed of two conditions, presented  
539 successively, always in the same order. Cue words selection is detailed in SI.  
540

#### 541 *FGAT-first condition*

542 After a 5-trials training session, participants performed the 62 trials of the first condition block (hereafter  
543 referred to as FGAT-first). They were presented with a cue word and instructed to provide the first word  
544 that came to mind after reading the cue word. They had 10 seconds to find a word and press the  
545 spacebar and then were allowed 10 seconds maximum to type it on a keyboard. This condition was  
546 used to explore the participants' spontaneous semantic associations and served as a control condition  
547 that is not a creative task per se.

548

549 *FGAT-distant condition*

550 In a different following block, participants were administered 62 trials of the second condition of the task  
551 (hereafter referred to as FGAT-distant). On each trial, they were presented with a cue word as in the  
552 previous condition and instructed to press the spacebar once they had thought of a word unusually  
553 associated with the cue. They were asked to find a distant but understandable associate and to think  
554 creatively. They had 20 seconds to think of a word and press the spacebar and then were allowed 10  
555 seconds maximum to type it. This condition was used to measure the participants' ability to produce  
556 remote and creative associations intentionally.

557

558 4.2.2. Rating tasks

559

560 After the FGAT task, participants performed two rating tasks. In the first block, they had to rate how  
561 much they liked an association of two words (likeability rating task). Then, in a separate block performed  
562 after the Choice task (see below), they had to rate the originality and the adequacy (originality and  
563 adequacy rating task) of the same associations as in the likeability rating task.

564

565 *Likeability Rating task*

566 After a 5-trial training session, participants performed 197 trials in which they were presented with an  
567 association of two words (cue-response, see below) and asked to rate how much they liked this cue-  
568 response association in a creative context, i.e., how much they like it or would have liked to find it during  
569 the FGAT *Distant* condition. A cue-response association was displayed on the screen, and 0.3 to 0.6  
570 seconds later, a rating scale appeared underneath it. The rating scale's low to high values were  
571 represented from left to right, without any numerical values but with 101 steps and a segment indicating  
572 the middle of the scale (later converted in ratings ranging between 0 and 100). Participants entered their  
573 rating by pressing the left and right arrows on the keyboard to move a slider across the rating scale, with  
574 the instruction to use the whole scale. Once satisfied with the position of the slider, they pressed the  
575 spacebar to validate their rating and went on to the subsequent trial. No time limit was applied, but  
576 participants had the instruction to respond as spontaneously as possible. A symbol (a heart for likeability  
577 ratings) was placed underneath the scale as a reminder of the dimension on which the words were to  
578 be rated.

579

580 *Originality and Adequacy Ratings*

581 Another Rating task was performed after the Choice task. After a 5-trial training session, participants  
582 performed a block of 197 trials. They were asked to rate the same set of associations as in the likeability  
583 task, but this time in terms of originality and adequacy, and in a different random order. In the  
584 instructions, an original association was described as 'original, unusual, surprising'. An adequate  
585 association was described as 'appropriate, understandable meaning, relevant, suitable'. Note that the  
586 instructions were given in French to the participants and the adjectives used in here are the closest  
587 translation we could find.

588 For each cue-response association, participants had to rate originality and adequacy dimensions one  
589 after the other, in a balanced order (in half of the trials, participants were asked to rate the association's  
590 adequacy before its originality, and in the other half of the trials, it was the opposite). The order was  
591 unpredictable for the participant. Similar to the likeability ratings, the rating scale appeared underneath  
592 the association after 0.3 to 0.6 seconds, with a different symbol below it: a star for originality ratings and  
593 a target for adequacy ratings, as depicted in Figure 2.

594

595 *Cue-word associations*

596 The 197 cue-response associations presented in the rating tasks and choice task were built with 35  
597 FGAT cue words randomly selected for each participant, at the end of FGAT with a MatLab script that  
598 implemented an adaptive design with the following rules. Each cue word was associated with seven  
599 words, amounting to 245 possible associations in total. The seven associated words for each cue word  
600 were selected from the participant's answers and from another dataset collected previously in the lab  
601 that gathers the responses of 96 independent and healthy participants on a similar FGAT task (See SI  
602 Supplementary Methods for a full description).

603

604 4.2.3. Choice task

605

606 Between the likeability rating task and the adequacy-originality rating task, participants performed a  
607 binary choice task. They had to choose between two words the one they preferred to be associated with  
608 a cue in a creative context, i.e., in the FGAT *Distant* context. Instructions were as follows: 'For example,  
609 would you have preferred to answer "silver" or "jewellery" to "necklace" when generating original  
610 associations during the previous task?' (There was additionally a reminder of the FGAT *Distant*  
611 condition, in the instructions). Details of the task can be found in SI Supplementary Methods.  
612

#### 613 4.2.4. Battery of creativity tests

614  
615 A battery of creativity tests run on Qualtrics followed the previous tasks, in order to assess creative  
616 abilities and behavior of the participants. It was composed of the alternative uses task (AUT), the  
617 inventory of Creative Activities and Achievements (ICAA), a self-report of creative abilities, a scale of  
618 preferences in creativity between adequacy and originality (SPC) and a fluency task on six FGAT cues.  
619 There are described in detail in the Supplementary Methods.  
620

### 621 4.3. Statistical analysis and computational modelling

622  
623 All analyses were performed using Matlab (MATLAB. (2020). 9.9.0.1495850 (R2020b). Natick,  
624 Massachusetts: The MathWorks Inc.). Model fitting and comparison were conducted using the VBA  
625 toolbox (<https://mbb-team.github.io/VBA-toolbox/>) (65).  
626

#### 627 4.3.1. Analyses of the FGAT responses

628  
629 The main behavioral measures of interest in the FGAT task are the response time (pressing the space  
630 key to provide an answer), the typing speed (number of letters per second), and the associative  
631 frequency of the responses. This frequency was computed based on a French database called *Dictaverf*  
632 (<http://dictaverf.nsu.ru/>)(66) built on spontaneous associations provided by at least 400 individuals in  
633 response to 1081 words (each person saw 100 random words). Frequencies were log-transformed to  
634 take into account their skewed distribution toward 0. Cues varied in terms of steepness (the ratio  
635 between the associative frequency of the first and distant associate of a given cue word), which also  
636 constituted a variable of interest. The ratings provided by subjects on their own responses (adequacy,  
637 originality, and likeability) were also used as variables of interest.

638 Linear regressions were conducted at the subject level between normalized variables. Significance was  
639 tested at the group level using one sample two-tailed t-test on coefficient estimates.  
640

#### 641 4.3.2. Model fitting and comparison

642  
643 Every model/module was fitted at the individual level to ratings and choices using the Matlab VBA-  
644 toolbox, which implements Variational Bayesian analysis under the Laplace approximation (67, 68). This  
645 iterative algorithm provides a free-energy approximation to the marginal likelihood or model evidence,  
646 which represents a natural trade-off between model accuracy (goodness of fit) and complexity (degrees  
647 of freedom) (69, 70). Additionally, the algorithm provides an estimate of the posterior density over the  
648 model free parameters, starting with Gaussian priors. Individual log-model evidence were then taken to  
649 group-level random-effect Bayesian model selection (RFX-BMS) procedure (68, 71). RFX-BMS  
650 provides an exceedance probability ( $X_p$ ) that measures how likely it is that a given model (or family of  
651 models) is more frequently implemented, relative to all the others considered in the model space, in the  
652 population from which participants were drawn (68, 71).  
653

654 We conducted the first model comparison to determine which variable (Adequacy A, Originality O or  
655 Likeability L) best explained choices (Methods 4.3.3). The second model comparison was performed to  
656 identify which utility function (*valuator* module) best explained how originality and adequacy were  
657 combined to compute likeability (Methods 4.3.4). The third one aimed at establishing relationships  
658 between adequacy and originality ratings and associative frequency of cue and responses (Methods  
659 4.3.4). The fourth one aimed at identifying the best possible input variable for the *selector* module  
660 (Methods 4.3.7).  
661

#### 662 4.3.3. Relationship between choices and ratings

663

664 Logistic regression was applied to choices as a dependant variable, with likeability (L), originality (O) or  
 665 adequacy (A) ratings as regressors. Choices were analyzed at the subject level and tested for  
 666 significance at the group level (random-effect analysis) using two-tailed, paired, Student's t-tests. The  
 667 softmax function used to determine which variable (V) among likeability, adequacy or originality ratings  
 668 was better explaining the proportion choices for left options (P(Left)) against right options is the following:

$$669 \quad P(\text{Left}) = \frac{1}{1 + e^{-\frac{V_{\text{Left}} - V_{\text{Right}} - d}{\beta_{\text{choice}}}}}$$

670  
 671 With  $d$  being a constant term aiming at capturing any bias towards one side and  $\beta_{\text{choice}}$  the temperature  
 672 (choice stochasticity).

673  
 674 4.3.4. Valuator module: combining likeability originality and adequacy of the rating tasks with  
 675 responses associative frequency  
 676

677 The ratings were used to estimate the likeability of a given response to a cue from its adequacy and  
 678 originality, themselves estimated from its associative frequency.

679  
 680 *Likeability ratings relationship with adequacy and originality ratings*  
 681 First, we fitted 12 different functions to likeability ratings capturing linearly (or not) the relationship  
 682 between likeability (L) and adequacy (A) and originality (O):  
 683

684 - Linear models:  

$$L_i = \beta A_i \quad L_i = \alpha O_i + (1 - \alpha)A_i \quad L_i = \alpha O_i + \beta A_i$$

685  
 686 - Linear with interaction term models:  

$$L_i = \alpha O_i + (1 - \alpha)A_i + \gamma O_i * A_i \quad L_i = \alpha O_i + \beta A_i + \gamma O_i * A_i \quad L_i = \gamma O_i * A_i$$

687  
 688 - Non-linear models (with the same non-linearity on both dimensions):  

$$L_i = (\alpha O_i^\delta + (1 - \alpha)A_i^\delta)^{\frac{1}{\delta}} \text{ (CES)} \quad L_i = (\alpha O_i^\delta + \beta A_i^\delta)^{\frac{1}{\delta}} \quad L_i = \alpha O_i^\delta + \beta A_i^\delta$$

689  
 690 The first non-linear model is also referred as Constant Elasticity of Substitution (CES) (57)  
 691

692 - Non-linear models (with different non-linearity on both dimensions):  

$$L_i = \beta A_i^\delta \quad L_i = \alpha O_i^\delta + (1 - \alpha)A_i^\epsilon \quad L_i = \alpha O_i^\delta + \beta A_i^\epsilon$$

693  
 694 Greek letters correspond to free parameters estimated with the fitting procedure described below;  $i$   
 695 refers to a given cue-response association.  
 696

697 *Adequacy and originality ratings relationship with associative frequency*  
 698 Second, we investigated how adequacy and originality were linked to associative frequency between a  
 699 cue and a response  $F_{ci}$ . For each dimension X (A or O), we compared three models:  
 700

$$X_i = \mu_x^l \log(F_{ci}) \quad X_i = \mu_x^q \log(F_{ci})^2 \quad X_i = \mu_x^l \log(F_{ci}) + \mu_x^q \log(F_{ci})^2$$

701  $\mu_x^l$  corresponds to the linear regression coefficient and  $\mu_x^q$  to the quadratic regression coefficient.

702  
 703 4.3.5. Model identification group and test group  
 704

705 We randomly split our group of participants into two subgroups, one group to develop the *explorer* and  
 706 *selector* modules (2/3 of the group: 46 subjects) and one group to validate the full module (combination  
 707 of the *explorer*, *valuator* and *selector* modules) by comparing its behavioral prediction to the actual  
 708 behavior of the participants (23 subjects).  
 709

#### 710 4.3.6. Modelling the explorer module

711

##### 712 *Construction of semantic networks*

713 The *Dictaverf* database consists of 1081 cue words associated with 23340 other words and is organized  
714 as a matrix M of i rows and j columns, with associative frequencies directed from the cue-words i to the  
715 response-words in j. We used this database combined with FGAT responses to build a symmetric  
716 adjacency matrix C of word associations for each cue word, applying the following procedure.

717 1) A list of all FGAT responses (*First* and *Distant*) from the current and the former datasets of the  
718 lab was created for each cue.

719 2) Then, for each response in the list:

720 a. If it was already associated with the cue in *Dictaverf*, for example, “learning” in response  
721 to “school”, then:  $C(\text{school}, \text{learning}) = C(\text{learning}, \text{school}) = M(\text{school}, \text{learning})$ .

722 b. If it was not associated with the cue in *Dictaverf*: we looked for it in the whole database  
723 and identified all potential intermediate nodes between the cue and the word (any other  
724 words associated with both the cue and the response). For instance, one subject  
725 responded “anxiety” to “school”. “Anxiety” was not directly linked to “school” in M, but it  
726 was connected to “studies”, which was connected to “school”. Then, “anxiety” was  
727 added as a row (and column for symmetry) in the matrix C, and frequency between  
728 “Anxiety” and “studies” was defined as the frequency between “studies” and “anxiety”  
729 from M. “Studies” was also added as a row (and column) in C and the frequency  
730 between “studies” and “school” was set as the frequency between “school” and  
731 “studies”:

732  $C(\text{anxiety}, \text{studies}) = C(\text{studies}, \text{anxiety}) = M(\text{studies}, \text{anxiety})$

733 and

734  $C(\text{studies}, \text{school}) = C(\text{school}, \text{studies}) = M(\text{studies}, \text{school})$ .

735 In this example, when then building a network based on C (see below), “anxiety” is thus  
736 connected to “school” via the node “studies”.

737 This procedure was applied to all potential intermediate nodes, independently of the  
738 number of intermediates.

739

740 This procedure yielded 62 symmetric C matrices (one per cue) with a size of around 1022 by 1022 words  
741 (ranging between 689 and 1186). The first row and column of each matrix correspond to the cue on  
742 which the matrix has been built (SI Figure S5 for visual explanation).

743

744 Sixty-two networks N were built based on those C matrices as unweighted and undirected graphs (two  
745 nodes were linked by an edge if the frequency of association between them was higher than 0).

746

##### 747 *Random walks variants and implementation*

748 We used censored random walks that start at a given cue and walk within its associated network N.  
749 Censored random walks have the property to not return to previously visited nodes. In case of a dead-  
750 end, the censored random walk starts over from the cue but does not go back to previously visited  
751 nodes. The five following variants of censored random walks were applied to the semantic networks to  
752 simulate potential paths.

753 - The random walk random (RWR) was a censored random walk starting at the cue and with  
754 uniform distribution of probabilities of transition from the current node to each of its neighbours  
755 (excluding previously visited nodes).

756 - The random walk frequency (RWF) was a censored random walk biased by the associative  
757 frequency between nodes, where the probability of transition from one node to another one is  
758 defined as follows:

$$P_{ij}^F = \frac{F_{ij}}{\sum_j F_{ij}}$$

759 with  $P_{ij}^F$  the probability of transition to node j,  $F_{ij}$  the frequency of the association in the C matrices  
760 described above with the current node i, and j all the other nodes linked to the current node n.

761 - Three additional censored random walks were run. They were biased by adequacy (RWA),  
762 originality (RWO), or likeability (RWL) of association between nodes and cue, where the  
763 probability of transition from one node to another one is defined as follows:

764

$$P_{ij}^X = \frac{X_{cj}}{\sum_j X_{cj}}$$

765  
766 with  $P_{ij}^X$  the probability of transition from node  $i$  to node  $j$ ,  $X_{cj}$  the estimated adequacy, originality, or  
767 likeability of the node  $j$  with the cue node  $c$ ,  $j$  are all the nodes linked to the current node  $i$ .  
768

769 Estimated adequacy, originality and likeability of all the network nodes ( $X_i$ ) were computed based on  
770 the results of the model comparison performed in the first section (see Methods 4.3.4). The following  
771 equations were consequently used:

$$A_i = \mu_A \log(F_{ci})$$

$$O_i = \mu_O^l \log(F_{ci}) + \mu_O^q \log(F_{ci})^2$$

772

$$L_i = (\alpha O_i^\delta + (1 - \alpha) A_i^\delta)^{\frac{1}{\delta}}$$

773

774 With  $F_{ci}$  as the frequency of association between the node and the cue.

775 Note that if a given node was not directly linked to the cue, we computed  $F_{ci}$  as the cumulative product  
776 of the frequency of association of the nodes belonging to the shortest path between the cue and the  
777 node. For example:  $F_{\text{school-anxiety}} = F_{\text{school-studies}} \times F_{\text{studies-anxiety}}$ .

778 Also, if one node (cue-word association) has actually been rated by the participant,  $\mu_A$ ,  $\mu_O^l$ ,  $\mu_O^q$ ,  $\alpha$ , and  $\delta$   
779 were estimated without that particular cue-word association (leave-one-out procedure) to avoid double-  
780 dipping. For example, if the cue-response "School-Anxiety" was rated at trial  $t$  by a participant, the  
781 predicted adequacy, originality, and likeability of trial  $t$  for that participant were computed with parameters  
782 estimated with all trials except trial  $t$ . This procedure lengthens the processing time of the random walks  
783 RWA, RWO and RWL but has the advantage of avoiding double-dipping.

784

785 The number of steps performed by each random walk was constant across cues and participants and  
786 was defined by the median of fluency score among the group, i.e., 18 steps, resulting in no more than  
787 17 visited nodes.  
788

789 *Probability of reaching First and Distant responses for each participant and cue*

790 We computed the probability of reaching the *First* and *Distant* responses (Targets  $T$ ) from a starting  
791 node cue ( $c$ ) for each type of random walk as follows:

792

$$P_{c,T} = \sum_{G=a}^z \prod_{\substack{i=c \\ i,j \in G}}^{j=T} P_{i,j}$$

793

794 With  $G$  representing all possible paths between  $c$  and  $T$ , ranging from the shortest one ( $a$ ) to the longest  
795 one ( $z$ ) (limited to 18 steps) and  $i$  and  $j$  all pairs of nodes belonging to each path, linked by a transition  
796 probability  $P_{i,j}$ . In other words, it corresponds to the sum of the cumulative product of edge weights for  
797 all the possible paths between the cue and the target shorter than 18 steps.  
798

#### 799 4.3.7. Decision functions as the selector module

800

801 Next, we intended to decipher the criteria determining the selection of a given response.

802 For each subject and cue, we simulated RWF as described above and retained the paths that contained  
803 both the *First* and *Distant* response of the subject for further analyses (the number of excluded cues  
804 ranged between 0 and 31 trials over 62,  $M=9.04$  trials, exclusion mainly due to missing responses from  
805 participants either in the FGAT *First* or *Distant* condition).

806 For each subject, we built two response matrices  $R^F$  and  $R^D$  of the same size  $n$  by  $t$ ,  $t$  being the number  
807 of cues (equivalent of trials within one FGAT condition) retained (53 cues per subject on average) and  
808  $n$  the number of nodes visited by the RWF (fixed at 18) (See SI Figure S6 for visual explanation). Those  
809 matrices were filled with zeros, except for nodes and trials that corresponded to the actual participant  
810 response.  $R^F$  contains ones for cells actually corresponding to the subject's *First* response (one 1 per  
811 column), and  $R^D$  contains ones for cells corresponding to the subject's *Distant* response. In order to  
812 determine the variable on which the selector module was likely to rely on, we built and compared seven  
813 matrices of values  $M_x$  of size  $n$  by  $t$ .

- 814 -  $M_r$ : random values in the matrix
- 815 -  $M_P$ : matrix with value decreasing with the order in the path
- 816 -  $M_A$ : matrix with estimated adequacy of each visited node in the path
- 817 -  $M_O$ : matrix with estimated originality of each visited node in the path
- 818 -  $M_L$ : matrix with estimated likeability of each visited node in the path
- 819 -  $M_{A+O}$ : Sum of A and O
- 820 -  $M_{A*O}$ : Product of A and O

821  
822  $M_{A+O}$  and  $M_{A*O}$  were added as controls for likeability, which relies on a non-linear weighted sum of  
823 adequacy and originality (CES).

824 Using the VBA toolbox, we fitted the following multivariate *softmax* functions to  $R^F$  and  $R^D$  separately for  
825 the seven different matrices:  
826

$$P(R_{i,t}^F) = \frac{e^{-X_{i,t}/\beta^F}}{\sum_{k=1}^n e^{-(X_{k,t}/\beta^F)}} \quad P(R_{i,t}^D) = \frac{e^{-(X_{i,t})/\beta^D}}{\sum_{k=1}^n e^{-(X_{k,t})/\beta^D}}$$

827  
828 P is the probability of the node  $i$  to be selected as a response (R) *First* (F) or *Distant* (D) among all the  
829 possible nodes  $k$  belonging to the  $n$  options from the paths at trial  $t$  (for a given cue). X corresponds to  
830 the values within the seven different input matrices.  $\beta^F$  and  $\beta^D$  are free parameters estimated per subject,  
831 corresponding to the temperature (choice stochasticity).

832 We then compared the seven models for the *First* and *Distant* response separately and reported the  
833 results of the model comparison in the results.

834

#### 835 4.3.8. Cross-validation of the model: comparing the surrogate data to human behavior

836

837 To simulate the behavior of the remaining 23 subjects, we combined all the previously described  
838 modules together and released some constraints imposed by the model investigation. We applied RWF  
839 with 18 steps on the built networks (see Methods 4.3.6) and assigned values to each visited node  
840 according to each subject's valuator module parameters. The list of visited nodes (candidate responses)  
841 for each cue and each subject was simulated without the constraint of containing participants' *First* and  
842 *Distant* responses. The selection was made using an *argmax* rule on adequacy (winning value for the  
843 selector module) for the *First* response and on likeability (winning value for the selector module) for the  
844 *Distant* response (as we do not have the selection temperature parameters  $\beta^F$  and  $\beta^D$  for those  
845 remaining subjects). We ran 100 simulations per individual following that procedure.

846 The rank in the path was used as a proxy for response time, and we analyzed surrogate data in the  
847 exact same way as subject behavior.

848 For statistical assessment, regression estimates of ranks against frequency, steepness, and estimated  
849 likeability were averaged across 100 simulations per individuals, and significance was addressed at the  
850 group level (one representative simulation was used in Figures 6 and S4). For this analysis, group  
851 frequency of response was computed instead of *Dictaverf* associative frequency to 1) avoid any  
852 confounds with the structure of the graph, built with *Dictaverf*, and 2) compare the distribution of  
853 frequencies relative to the group.

854

#### 855 4.3.9. Canonical correlation

856

857 To investigate the link between creative abilities and our task and model parameters, we extracted the  
858 individual task scores and model parameters and grouped them together, into the labelled "FGAT scores  
859 and parameters". We grouped the scores obtained from the battery of creativity test and labelled them  
860 "Battery scores". We conducted a canonical correlation between those two sets of variables and  
861 checked for significance of correlation between the computed canonical variables of each set. Note that  
862 a canonical correlation analysis can be compared to a Principal Component Analysis, in the sense that  
863 common variance between two data sets is extracted into canonical variables (equivalent of principal  
864 components). Canonical variables extracted for each data set are ordered in terms of strength of  
865 correlations between the two data sets. Each variable within a data set has a loading coefficient that  
866 indicates its contribution to the canonical variable. Here, we extracted the coefficients of each variable  
867 on its respective canonical variable and reported them.



## 868 5. Acknowledgements

869  
870 EV is funded by the 'Agence Nationale de la Recherche' [grant numbers ANR-19-CE37-001-01]. The  
871 research also received funding from the program 'Investissements d'avenir' ANR-10- IAIHU-06. MOT is  
872 funded by Becas-Chile of ANID. ALP was supported by the «Fondation des Treilles». The study was  
873 funded by the Paris Region Fellowship Program, "Horizon 2020 Marie Skłodowska- Curie n° 945298.  
874 The overall project to which this study belongs has received funding from the European Union's Horizon  
875 2020 research and innovation program under the Marie Skłodowska-Curie grant agreement No  
876 101026191. We thank all the participants to the study, Tess Brogard who helped collecting the data,  
877 Mehdi Khamassi who provided advices on the model structure.  
878

## 879 6. Data and code availability

880 Data and code will be made available upon publication.  
881

## 882 7. References

- 883  
884 1. A. Dietrich, The cognitive neuroscience of creativity. *Psychon. Bull. Rev.* **11**, 1011–1026 (2004).  
885 2. M. A. Runco, G. J. Jaeger, The Standard Definition of Creativity. *Creat. Res. J.* **24**, 92–96 (2012).  
886 3. R. E. Jung, O. Vartanian, *The Cambridge Handbook of the Neuroscience of Creativity* (Cambridge  
887 University Press, 2018).  
888 4. A. Dietrich, R. Kanso, A review of EEG, ERP, and neuroimaging studies of creativity and insight.  
889 *Psychol. Bull.* **136**, 822–848 (2010).  
890 5. E. Volle, "Associative and controlled cognition in divergent thinking: Theoretical, experimental,  
891 neuroimaging evidence, and new directions" in *The Cambridge Handbook of the Neuroscience of Creativity*,  
892 Cambridge Handbooks in Psychology., Cambridge University Press, (Editors: R.E. Jung and O. Vartanian, 2017).  
893 6. P. T. Sowden, A. Pringle, L. Gabora, The shifting sands of creative thinking: Connections to dual-process  
894 theory. *Think. Reason.* **21**, 40–60 (2015).  
895 7. V. Mekern, B. Hommel, Z. Sjoerds, Computational models of creativity: a review of single-process and  
896 multi-process recent approaches to demystify creative cognition. *Curr. Opin. Behav. Sci.* **27**, 47–54 (2019).  
897 8. O. M. Kleinmuntz, T. Ivancovsky, S. G. Shamy-Tsoory, The two-fold model of creativity: the neural  
898 underpinnings of the generation and evaluation of creative ideas. *Curr. Opin. Behav. Sci.* **27**, 131–138 (2019).  
899 9. D. T. Campbell, Blind variation and selective retentions in creative thought as in other knowledge  
900 processes. *Psychol. Rev.* **67**, 380 (1960).  
901 10. D. K. Simonton, Donald Campbell's Model of the Creative Process: Creativity as Blind Variation and  
902 Selective Retention. *J. Creat. Behav.* **32**, 153–158 (1998).  
903 11. M. Ellamil, C. Dobson, M. Beeman, K. Christoff, Evaluative and generative modes of thought during the  
904 creative process. *NeuroImage* **59**, 1783–1794 (2012).  
905 12. R. E. Beaty, M. Benedek, P. J. Silvia, D. L. Schacter, Creative Cognition and Brain Network Dynamics.  
906 *Trends Cogn. Sci.* **20**, 87–95 (2016).  
907 13. D. Bendetowicz, *et al.*, Two critical brain networks for generation and combination of remote  
908 associations. *Brain* (2017) <https://doi.org/10.1093/brain/awx294> (December 7, 2017).  
909 14. M. Donzallaz, J. M. Haaf, C. Stevenson, Creative or Not? Hierarchical Diffusion Modeling of the Creative  
910 Evaluation Process (2021) <https://doi.org/10.31234/osf.io/5eryv> (April 8, 2021).  
911 15. N. Maysseless, J. Aharon-Peretz, S. Shamy-Tsoory, Unleashing creativity: The role of left  
912 temporoparietal regions in evaluating and inhibiting the generation of creative ideas. *Neuropsychologia* **64**, 157–  
913 168 (2014).  
914 16. F. Huang, J. Fan, J. Luo, The neural basis of novelty and appropriateness in processing of creative chunk  
915 decomposition. *NeuroImage* **113**, 122–132 (2015).  
916 17. J. Ren, *et al.*, The function of the hippocampus and middle temporal gyrus in forming new associations  
917 and concepts during the processing of novelty and usefulness features in creative designs. *NeuroImage* **214**,  
918 116751 (2020).  
919 18. K. Rataj, D. S. Nazareth, F. van der Velde, Use a Spoon as a Spade?: Changes in the Upper and Lower  
920 Alpha Bands in Evaluating Alternate Object Use. *Front. Psychol.* **9** (2018).  
921 19. C. Rominger, *et al.*, Functional coupling of brain networks during creative idea generation and elaboration  
922 in the figural domain. *NeuroImage* **207**, 116395 (2020).  
923 20. M. F. S. Rushworth, T. E. J. Behrens, Choice, uncertainty and value in prefrontal and cingulate cortex.  
924 *Nat. Neurosci.* **11**, 389–397 (2008).

- 925 21. A. D. Redish, N. W. Schultheiss, E. C. Carter, The Computational Complexity of Valuation and  
926 Motivational Forces in Decision-Making Processes. *Curr. Top. Behav. Neurosci.* **27**, 313–333 (2016).
- 927 22. A. Shenhav, U. R. Karmarkar, Dissociable components of the reward circuit are involved in appraisal  
928 versus choice. *Sci. Rep.* **9**, 1958 (2019).
- 929 23. M. Lebreton, S. Jorge, V. Michel, B. Thirion, M. Pessiglione, An Automatic Valuation System in the  
930 Human Brain: Evidence from Functional Neuroimaging. *Neuron* **64**, 431–439 (2009).
- 931 24. D. J. Levy, P. W. Glimcher, The root of all value: a neural common currency for choice. *Curr. Opin.*  
932 *Neurobiol.* (2012) <https://doi.org/10.1016/j.conb.2012.06.001> (October 22, 2012).
- 933 25. A. Lopez-Persem, P. Domenech, M. Pessiglione, How prior preferences determine decision-making  
934 frames and biases in the human brain. *eLife* **5**, e20317 (2016).
- 935 26. T. A. Hare, C. F. Camerer, A. Rangel, Self-Control in Decision-Making Involves Modulation of the  
936 vmPFC Valuation System. *Science* **324**, 646–648 (2009).
- 937 27. P. Domenech, J. Redouté, E. Koechlin, J.-C. Dreher, The Neuro-Computational Architecture of Value-  
938 Based Selection in the Human Brain. *Cereb. Cortex* **28**, 585–601 (2018).
- 939 28. S. A. Chermahini, B. Hommel, The (b)link between creativity and dopamine: Spontaneous eye blink rates  
940 predict and dissociate divergent and convergent thinking. *Cognition* **115**, 458–465 (2010).
- 941 29. M. Pessiglione, F. Vinckier, S. Bouret, J. Daunizeau, R. Le Bouc, Why not try harder? Computational  
942 approach to motivation deficits in neuro-psychiatric diseases. *Brain* **141**, 629–650 (2018).
- 943 30. Y. N. Kenett, D. Anaki, M. Faust, Investigating the structure of semantic networks in low and high  
944 creative persons. *Front. Hum. Neurosci.* **8** (2014).
- 945 31. M. Benedek, T. Könen, A. C. Neubauer, Associative abilities underlying creativity. *Psychol. Aesthet.*  
946 *Creat. Arts* **6**, 273 (2012).
- 947 32. M. Benedek, *et al.*, How semantic memory structure and intelligence contribute to creative thought: a  
948 network science approach. *Think. Reason.* **23**, 158–183 (2017).
- 949 33. M. Bernard, Y. N. Kenett, M. O. Tellez, M. Benedek, E. Volle, Building individual semantic networks  
950 and exploring their relationships with creativity. in *CogSci*, (2019), pp. 138–144.
- 951 34. T. Bieth, *et al.*, Dynamic changes in semantic memory structure support successful problem-solving  
952 (2021).
- 953 35. M. Ovando-Tellez, *et al.*, Brain connectivity-based prediction of real-life creativity is mediated by  
954 semantic memory structure. *bioRxiv* (2021).
- 955 36. J. C. Zemla, J. L. Austerweil, Modeling Semantic Fluency Data as Search on a Semantic Network. *CogSci*  
956 *Annu. Conf. Cogn. Sci. Soc. Cogn. Sci. Soc. US Conf.* **2017**, 3646–3651 (2017).
- 957 37. J. T. Abbott, J. L. Austerweil, T. L. Griffiths, Random walks on semantic networks can resemble optimal  
958 foraging. in *Neural Information Processing Systems Conference; A Preliminary Version of This Work Was*  
959 *Presented at the Aforementioned Conference.*, (American Psychological Association, 2015), p. 558.
- 960 38. Y. N. Kenett, J. L. Austerweil, Examining Search Processes in Low and High Creative Individuals with  
961 Random Walks. in *CogSci*, (2016), pp. 313–318.
- 962 39. P. A. Samuelson, The numerical representation of ordered classifications and the concept of utility. *Rev.*  
963 *Econ. Stud.* **6**, 65–70 (1938).
- 964 40. D. Von Winterfeldt, G. W. Fischer, Multi-attribute utility theory: models and assessment procedures. *Util.*  
965 *Probab. Hum. Decis. Mak.*, 47–85 (1975).
- 966 41. A. Lopez-Persem, L. Rigoux, S. Bourgeois-Gironde, J. Daunizeau, M. Pessiglione, Choose, rate or  
967 squeeze: Comparison of economic value functions elicited by different behavioral tasks. *PLOS Comput. Biol.* **13**,  
968 e1005848 (2017).
- 969 42. R. D. Luce, On the possible psychophysical laws. *Psychol. Rev.* **66**, 81 (1959).
- 970 43. R. Ratcliff, G. McKoon, The diffusion decision model: theory and data for two-choice decision tasks.  
971 *Neural Comput.* **20**, 873–922 (2008).
- 972 44. X.-J. Wang, Decision Making in Recurrent Neuronal Circuits. *Neuron* **60**, 215–234 (2008).
- 973 45. Y. Niv, Cost, Benefit, Tonic, Phasic: What Do Response Rates Tell Us about Dopamine and Motivation?  
974 *Ann. N. Y. Acad. Sci.* **1104**, 357–376 (2007).
- 975 46. P. R. Christensen, J. P. Guilford, R. C. Wilson, Relations of creative responses to working time and  
976 instructions. *J. Exp. Psychol.* **53**, 82–88 (1957).
- 977 47. R. E. Beaty, P. J. Silvia, Why do ideas get more creative across time? An executive interpretation of the  
978 serial order effect in divergent thinking tasks. *Psychol. Aesthet. Creat. Arts* **6**, 309–319 (2012).
- 979 48. R. Ratcliff, J. N. Rouder, Modeling Response Times for Two-Choice Decisions. *Psychol. Sci.* **9**, 347–356  
980 (1998).
- 981 49. M. M. Botvinick, T. S. Braver, D. M. Barch, C. S. Carter, J. D. Cohen, Conflict monitoring and cognitive  
982 control. *Psychol. Rev.* **108**, 624 (2001).
- 983 50. R. Ratcliff, J. J. Starns, Modeling confidence and response time in recognition memory. *Psychol. Rev.*  
984 **116**, 59–83 (2009).

- 985 51. A. Lopez-Persem, *et al.*, Four core properties of the human brain valuation system demonstrated in  
986 intracranial signals. *Nat. Neurosci.* **23**, 664–675 (2020).
- 987 52. A. Rangel, C. Camerer, P. R. Montague, A framework for studying the neurobiology of value-based  
988 decision making. *Nat. Rev. Neurosci.* **9**, 545–556 (2008).
- 989 53. M. Pessiglione, *et al.*, How the Brain Translates Money into Force: A Neuroimaging Study of Subliminal  
990 Motivation. *Science* **316**, 904–906 (2007).
- 991 54. M. A. Collins, T. M. Amabile, Motivation and creativity. (1999).
- 992 55. C. Fischer, C. P. Malycha, E. Schafmann, The Influence of Intrinsic Motivation and Synergistic Extrinsic  
993 Motivators on Creativity and Innovation. *Front. Psychol.* **10**, 137 (2019).
- 994 56. P. S. Armington, A Theory of Demand for Products Distinguished by Place of Production. *Staff Pap.* **16**,  
995 159–178 (1969).
- 996 57. J. Andreoni, J. Miller, Giving according to GARP: An experimental test of the consistency of preferences  
997 for altruism. *Econometrica* **70**, 737–753 (2003).
- 998 58. J. L. Austerweil, J. T. Abbott, T. L. Griffiths, Human memory search as a random walk in a semantic  
999 network. **9**.
- 1000 59. S. Mednick, The associative basis of the creative process. *Psychol. Rev.* **69**, 220–232 (1962).
- 1001 60. M. Benedek, J. Jurisch, K. Koschutnig, A. Fink, R. E. Beaty, Elements of creative thought: Investigating  
1002 the cognitive and neural correlates of association and bi-association processes. *NeuroImage* **210**, 116586 (2020).
- 1003 61. T. R. Marron, *et al.*, Chain Free Association, Creativity, and the Default Mode Network.  
1004 *Neuropsychologia* (2018) <https://doi.org/10.1016/j.neuropsychologia.2018.03.018> (March 20, 2018).
- 1005 62. S. Palminteri, V. Wyart, E. Koechlin, The Importance of Falsification in Computational Cognitive  
1006 Modeling. *Trends Cogn. Sci.* **21**, 425–433 (2017).
- 1007 63. R. Prabhakaran, A. E. Green, J. R. Gray, Thin slices of creativity: Using single-word utterances to assess  
1008 creative cognition. *Behav. Res. Methods* **46**, 641–659 (2014).
- 1009 64. J. Diedrich, *et al.*, Assessment of Real-Life Creativity: The Inventory of Creative Activities and  
1010 Achievements (ICAA). *Psychol. Aesthet. Creat. Arts* (2017) <https://doi.org/10.1037/aca0000137> (September 7,  
1011 2017).
- 1012 65. J. Daunizeau, V. Adam, L. Rigoux, VBA: A Probabilistic Treatment of Nonlinear Models for  
1013 Neurobiological and Behavioural Data. *PLoS Comput. Biol.* **10**, e1003441 (2014).
- 1014 66. M. Debrenne, Le dictionnaire des associations verbales du français et ses applications. *Variétés Var.*  
1015 *Formes Fr. Palaiseau Éditions L'École Polytech.* **355**, 366 (2011).
- 1016 67. J. Daunizeau, K. J. Friston, S. J. Kiebel, Variational Bayesian identification and prediction of stochastic  
1017 nonlinear dynamic causal models. *Phys. Nonlinear Phenom.* **238**, 2089–2118 (2009).
- 1018 68. K. E. Stephan, W. D. Penny, J. Daunizeau, R. J. Moran, K. J. Friston, Bayesian model selection for group  
1019 studies. *NeuroImage* **46**, 1004–1017 (2009).
- 1020 69. K. Friston, J. Mattout, N. Trujillo-Barreto, J. Ashburner, W. Penny, Variational free energy and the  
1021 Laplace approximation. *NeuroImage* **34**, 220–234 (2007).
- 1022 70. W. D. Penny, Comparing dynamic causal models using AIC, BIC and free energy. *Neuroimage* **59**, 319–  
1023 330 (2012).
- 1024 71. L. Rigoux, K. E. Stephan, K. J. Friston, J. Daunizeau, Bayesian model selection for group studies —  
1025 Revisited. *NeuroImage* **84**, 971–985 (2014).
- 1026

## 1027 Figures

1028  
1029  
1030

**Figure 1. Schematic representation of the computational model.**

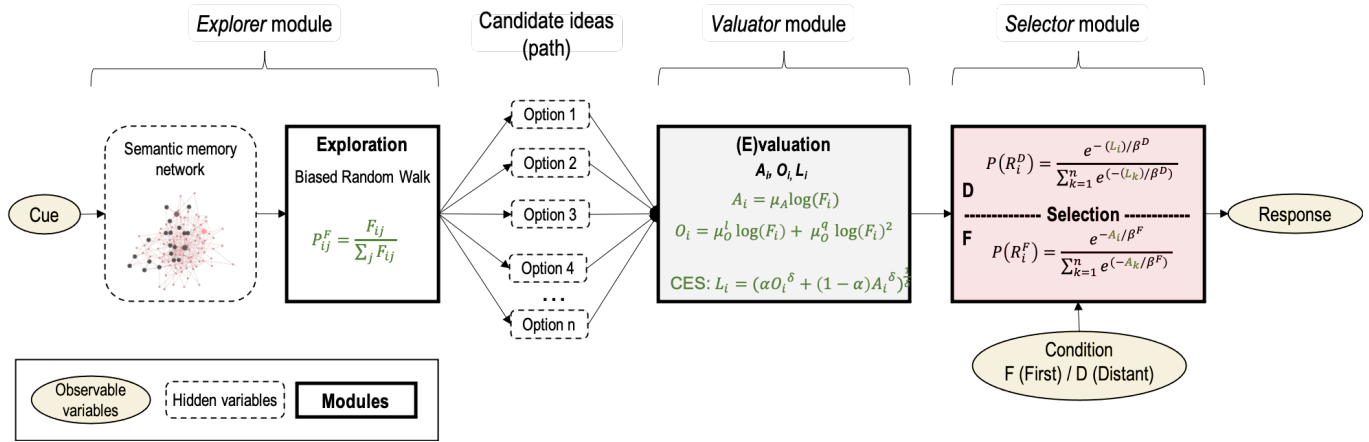

1031  
1032  
1033  
1034  
1035  
1036  
1037  
1038  
1039  
1040  
1041  
1042  
1043

The model takes as input a cue, that “activates” a semantic memory network. Semantic search (exploration) is implemented as a biased random walk, in which node transition probability  $P$  is determined by the frequency of association  $F$  between the node  $i$  and its connected nodes  $j$ . The visited nodes (option 1 to  $n$ ) are evaluated in terms of adequacy ( $A$ ), originality ( $O$ ) and the valuator assigns a likeability ( $L$ ) to each of them, CES stands for Constant Elasticity of Substitution, see Results. A response is selected in function of the FGAT condition: in the *First* condition ( $F$ ), the selection is based on adequacy and in the *Distant* condition ( $D$ ), the selection is based on likeability. Equations results from the different model comparisons conducted in the study and are detailed in the manuscript. Text in black corresponds to our framework and hypotheses while text green corresponds to the results obtained in our study.

1044 **Figure 2: Experimental design**

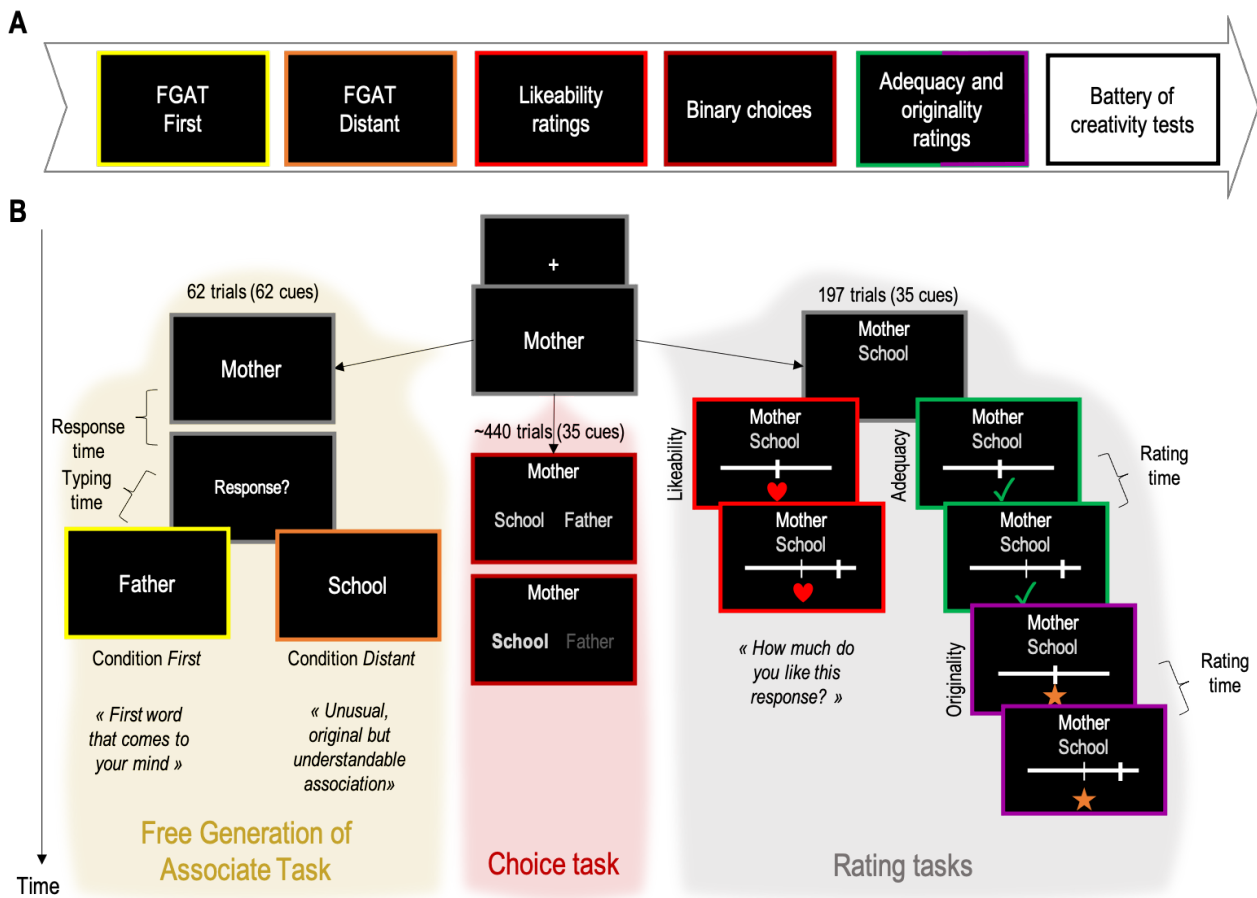

1045  
 1046 **A.** Chronological order of successive tasks. **B.** From top to bottom, successive screen shots of example trials are  
 1047 shown for the three types of tasks (left: FGAT task, middle: choice task, right: rating tasks). Every trial started with  
 1048 a fixation cross, followed by one cue word. In the **FGAT** task, when participant had a response in mind, they had to  
 1049 press the space bar and the word “Response?” popped out on the screen. The FGAT task had two conditions.  
 1050 Participants had to press a space for providing the first word that came to their mind in the *First* condition and an  
 1051 unusual, original but associated word in the *Distant* condition. In the **choice** task, two words were displayed on the  
 1052 screen below the cue. Participants had to choose the association they preferred using the arrow keys. As soon as  
 1053 a choice was made, another cue appeared on the screen and the next trial began. In the **rating** tasks, one word  
 1054 appeared on the screen below the cue. Then a scale appeared on the screen, noticing subjects that it was time for  
 1055 providing a response. In the likeability rating task, participants were asked to indicate how much they liked the  
 1056 association in the context of FGAT-distant. In the adequacy and originality rating tasks, each association was first  
 1057 rated on either adequacy and originality and then on the remaining dimension. Order was counterbalanced (see  
 1058 Methods for details).  
 1059

1060  
1061

**Figure 3: Behavioral results of the FGAT task.**

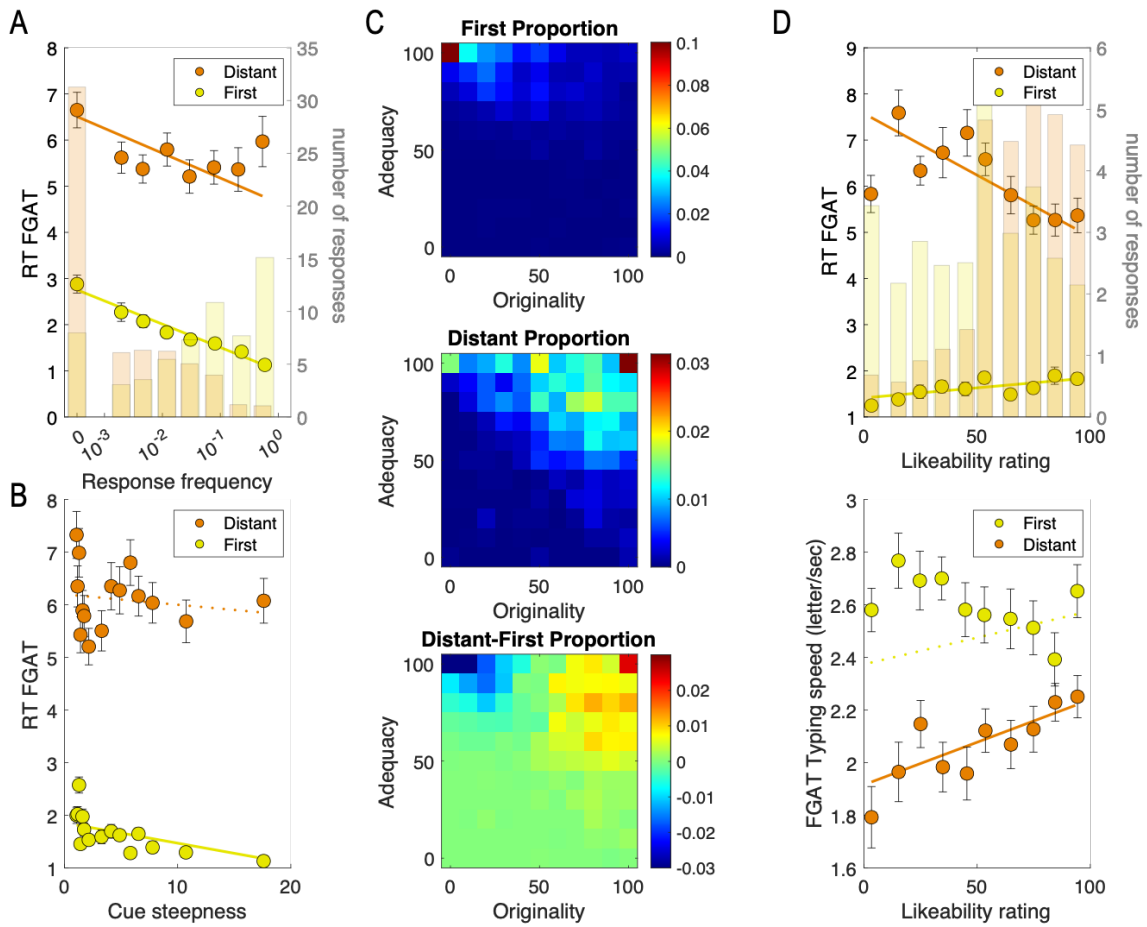

1062 **A.** Correlation between response time (RT) in the FGAT task and the response frequency for the *First* (yellow) and  
 1063 *Distant* (orange) conditions. **B.** Correlation between response time (RT) in the FGAT task and the cue steepness  
 1064 for the *First* (yellow) and *Distant* (orange) conditions. **C.** Heatmaps of *First* (top), *Distant* (middle) and *Distant-First*  
 1065 (bottom) proportions of responses per bin of adequacy and originality ratings. **D.** Correlation between response time  
 1066 (top) and typing speed (bottom) in the FGAT task and likeability ratings of the FGAT responses for the *First* (yellow)  
 1067 and *Distant* (orange) conditions. In **A**, **B**, **D**, circles indicate binned data averaged across participants. Error bars  
 1068 are intersubject s.e.m. Solid lines correspond to the averaged linear regression fit across participants, significant at  
 1069 the group level ( $p < 0.05$ ). Dotted lines indicate that the regression fit is non-significant at the group level ( $p > 0.05$ ).  
 1070 In **A** and **D top**, transparent bars correspond to the average number of responses per bin of frequency (A) or  
 1071 likeability (D).  
 1072

1073 **Figure 4. Behavioral results of the rating tasks: building the valuator module**

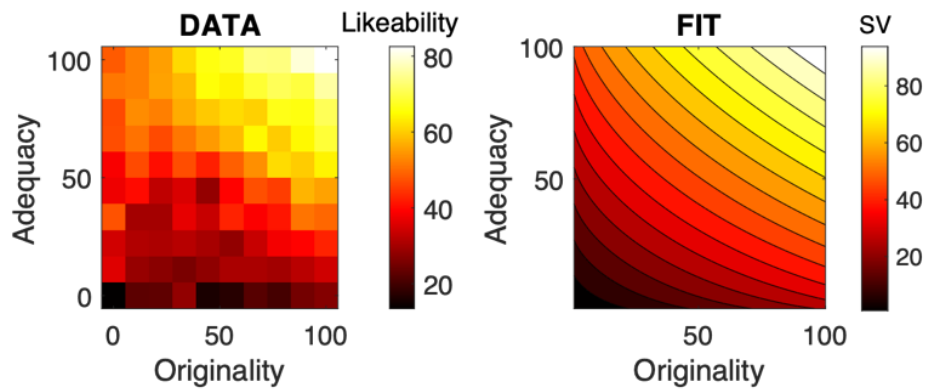

1074 Average likeability ratings (left) and fit (right) are shown as functions of adequacy and originality ratings. Black to  
1075 hot colors indicate low to high values of likeability ratings (left) or fitted subjective value (SV, right). The value  
1076 function used to fit the ratings was the CES utility function.  
1077

1078 **Figure 5: Random walks predictions and selection model comparison.**

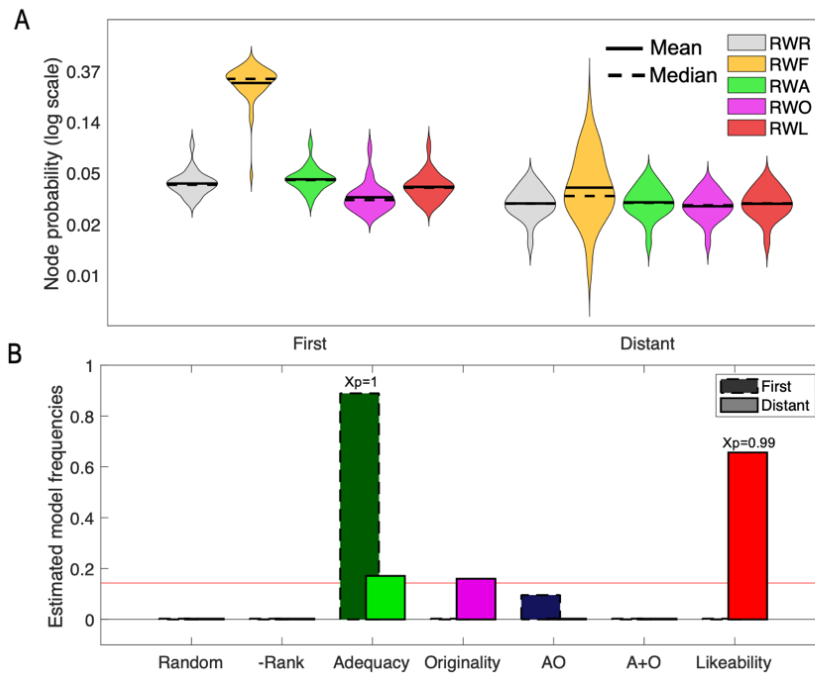

1079 **A.** Violin plots of the probability of each random walk (RW) to reach the *First* and *Distant* participant responses in  
1080 the semantic networks. RWR: random, RWF: frequency biased, RWA: adequacy-biased, RWO: originality biased,  
1081 RWL: likeability biased. Violins represent the distribution of the averaged probabilities across trials for the subgroup  
1082 of participants used to develop the model (n=46). **B.** Estimated model frequency of selection models for *First* (dark  
1083 colors) and *Distant* (lighter colors) responses. Red line indicate chance level.  
1084  
1085



1086  
1087

**Figure 6. Response speed for the participants and surrogate data of the test group (n=23)**

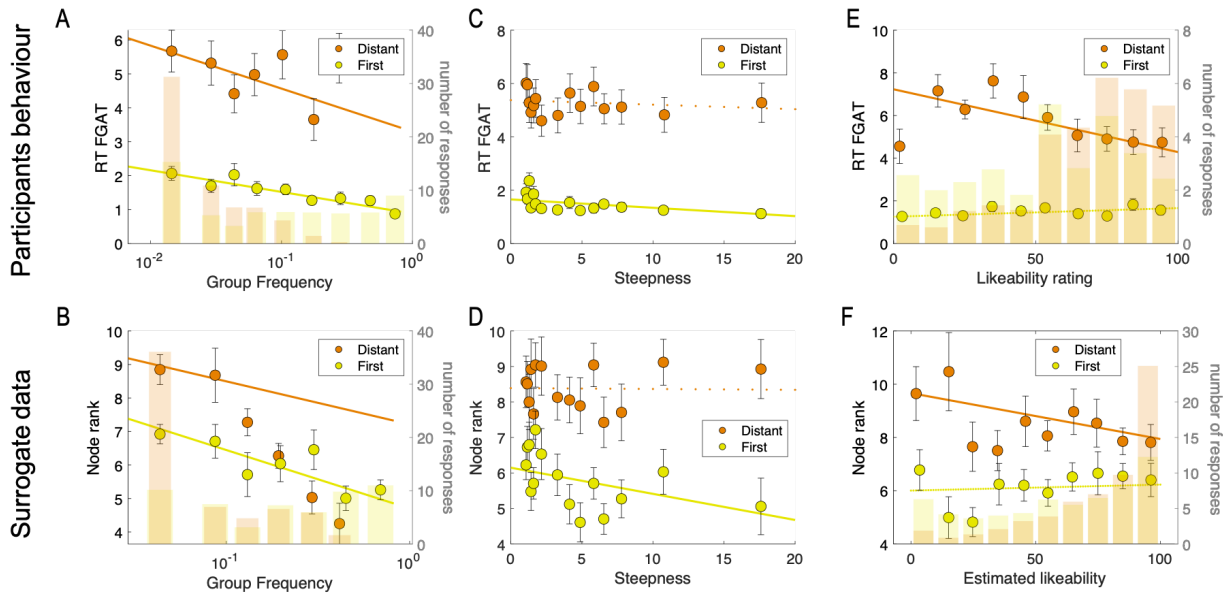

1088 **A, B.** Correlation between response time RT (A) or node rank (B) in the FGAT task and the response frequency for the *First* (yellow) and *Distant* (orange) conditions. **C, D.** Correlation between response time RT (C) or node rank (D) in the FGAT task and the cue steepness for the *First* (yellow) and *Distant* (orange) conditions. **E, F.** Correlation between response time RT (E) or node rank (F) in the FGAT task and likeability ratings (E) or estimated likeability (F) of the FGAT responses for the *First* (yellow) and *Distant* (orange) conditions. Circles indicate binned data averaged across participants. Error bars are intersubject s.e.m. Solid lines corresponds to the averaged linear regression fit across participants, significant at the group level ( $p < 0.05$ ). Dotted lines indicate that the regression fit is non-significant at the group level ( $p > 0.05$ ). In **A, B, E** and **F**, transparent bars correspond to the average number of responses per bin of frequency (A, B) or likeability (E, D). Note that the surrogate data presented in the Figure correspond to one simulation (among 100) that is representative of the statistics obtained over all simulations and reported in the text.

1089  
1090  
1091  
1092  
1093  
1094  
1095  
1096  
1097  
1098  
1099

1100 **Figure 7: Canonical correlation between the FGAT parameters/metrics and creativity tests belonging to a**  
 1101 **battery**

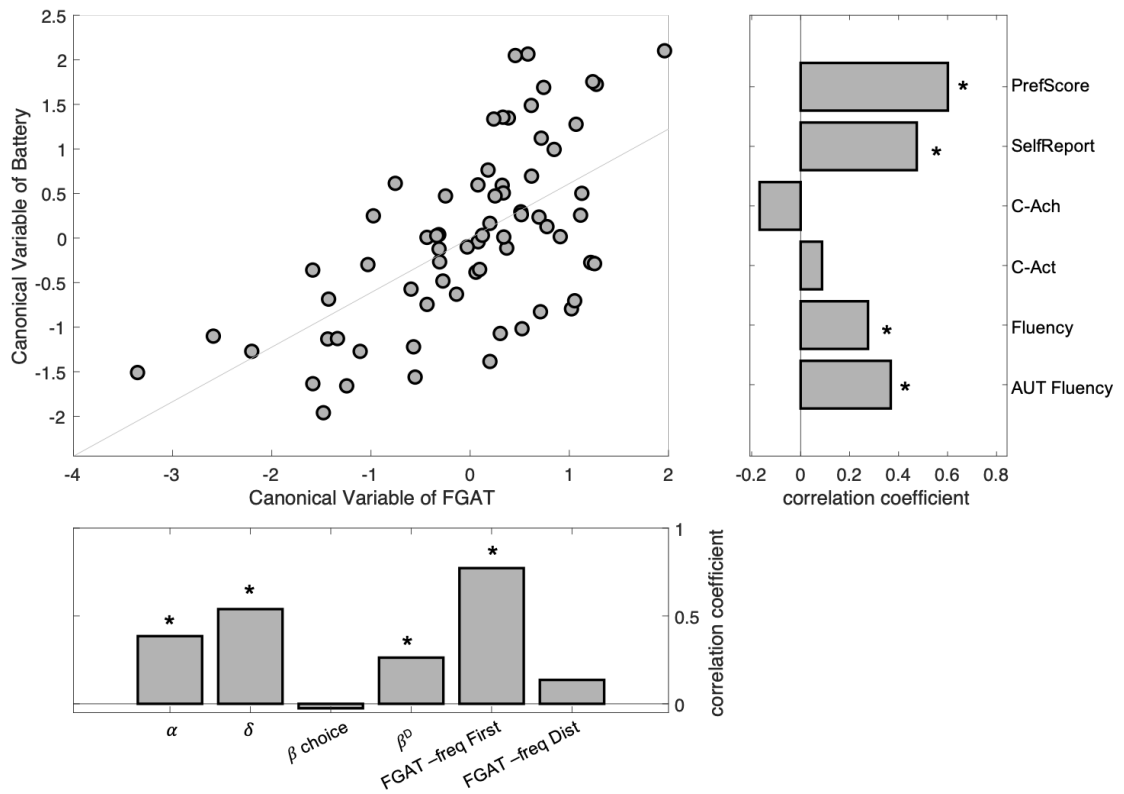

1102 Top left. Correlation between the first canonical variables of the battery of tests and of the FGAT parameters/metrics.  
 1103 Each dot represents one participant. Top right: correlation coefficient between each battery test and the canonical  
 1104 variable of Battery. Bottom left: correlation coefficient between each FGAT parameters/metrics and the canonical  
 1105 variable of FGAT. Stars indicate significance ( $p > 0.05$ ).
